# Supplementary material
Source: PubMed Central journal article supplement (PMC1904151)

**A**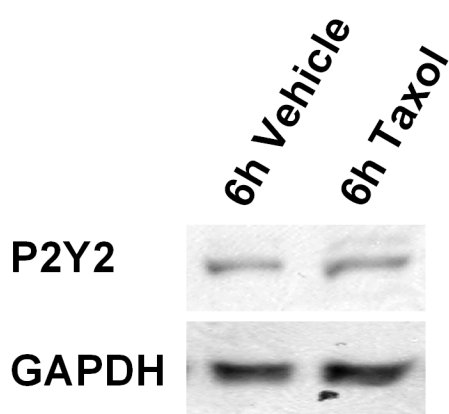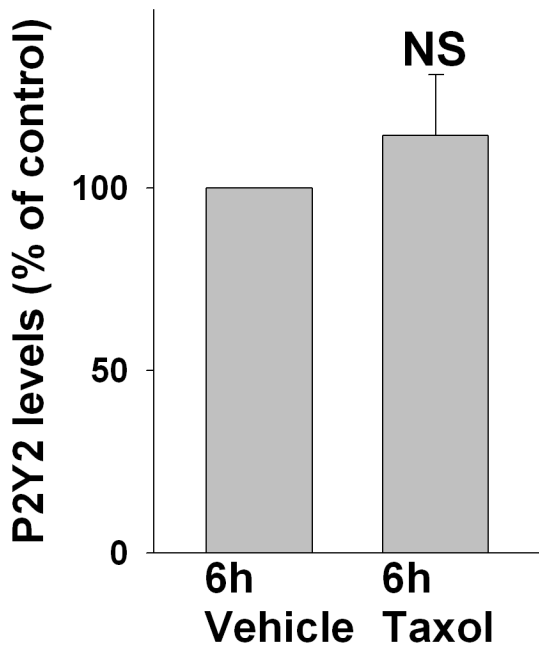**B**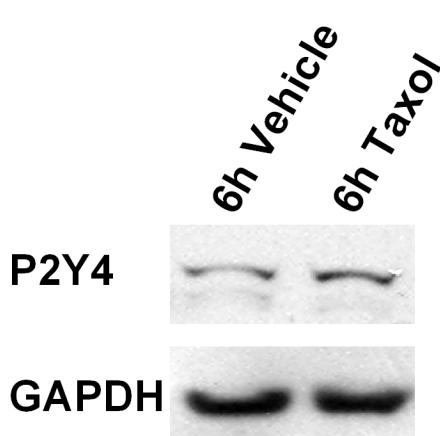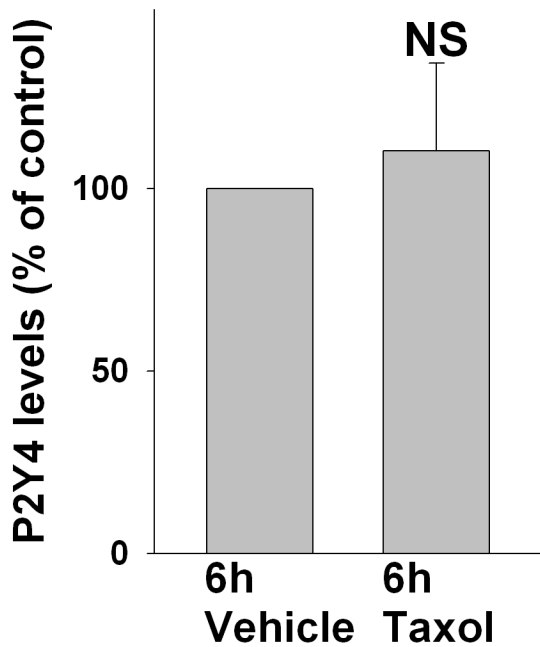

Supplement: pnas_0701546104_1.pdf [file pnas_0701546104_1.pdf]

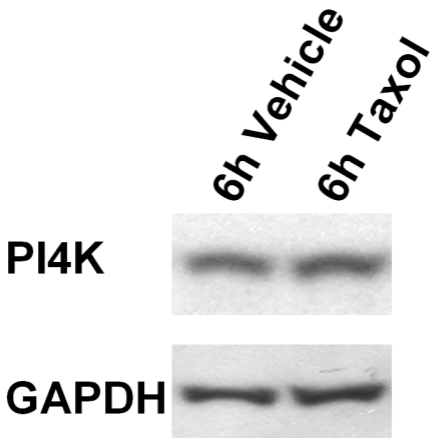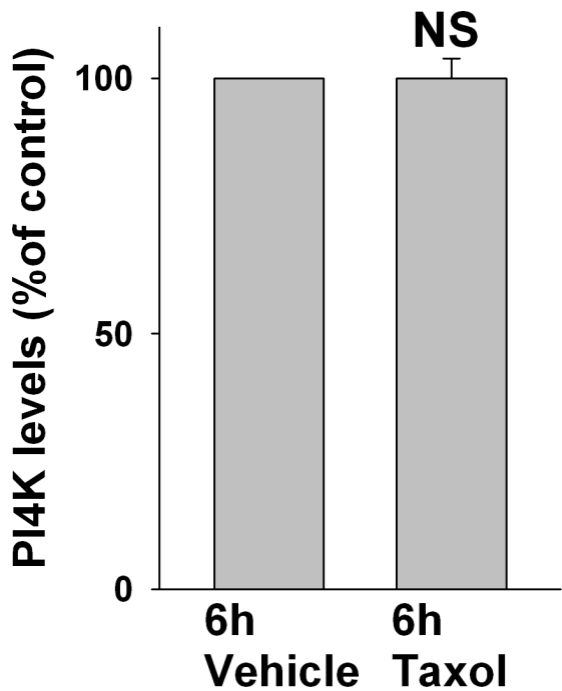

Supplement: pnas_0701546104_2.pdf [file pnas_0701546104_2.pdf]

**10 $\mu$ M BAPTA/AM  
for 1h**

---

**Vehicle**  
**800 ng/ml**  
**Paclitaxel 6h**

**$\beta$ -Actin**

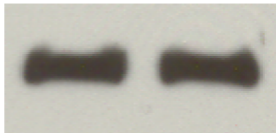

**NCS-1**

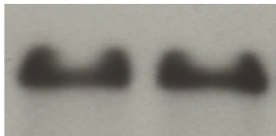

Supplement: pnas_0701546104_3.pdf [file pnas_0701546104_3.pdf]
